# Supplementary material for: Star formation in Galactic spiral arms and the interarm regions
Source: Oxford University Press journal article supplement (doi:10.1093/mnras/stt279), 2013-03-12
Supplement: stt279_Supplementary_Data.zip [file stt279_Supplementary_Data.zip]

Table 1: Summary of GRS cloud parameters and BGPS source associations.

| GRS Cloud<br>Name | GRS<br>$V_{LSR}$<br>(km s <sup>-1</sup> ) | GRS<br>$D$<br>(kpc) | BGPS<br>Source<br>ID | BGPS<br>$l$<br>(°) | BGPS<br>$b$<br>(°) |
|-------------------|-------------------------------------------|---------------------|----------------------|--------------------|--------------------|
| G037.69+00.09     | 84.10                                     | 6.70                | 5878                 | 37.86              | 0.14               |
| G037.69+00.09     | 84.10                                     | 6.70                | 5889                 | 38.04              | 0.08               |
| G037.69+00.09     | 84.10                                     | 6.70                | 5893                 | 38.10              | -0.08              |
| G037.69+00.09     | 84.10                                     | 6.70                | 5908                 | 38.35              | -0.21              |
| G037.69+00.09     | 84.10                                     | 6.70                | 5910                 | 38.37              | -0.15              |
| G037.74-00.06     | 86.65                                     | 6.70                | 5880                 | 37.89              | -0.10              |
| G037.74-00.06     | 86.65                                     | 6.70                | 5883                 | 37.92              | -0.09              |
| G037.74-00.06     | 86.65                                     | 6.70                | 5886                 | 37.99              | 0.01               |
| G037.74-00.06     | 86.65                                     | 6.70                | 5887                 | 38.02              | -0.01              |
| G037.74-00.06     | 86.65                                     | 6.70                | 5888                 | 38.03              | -0.01              |
| G037.74-00.06     | 86.65                                     | 6.70                | 5890                 | 38.04              | -0.04              |
| G037.74-00.06     | 86.65                                     | 6.70                | 5892                 | 38.10              | -0.06              |
| G037.74-00.06     | 86.65                                     | 6.70                | 5894                 | 38.12              | -0.23              |
| G037.74-00.06     | 86.65                                     | 6.70                | 5895                 | 38.16              | -0.05              |
| G037.74-00.06     | 86.65                                     | 6.70                | 5896                 | 38.16              | -0.08              |
| G037.74-00.06     | 86.65                                     | 6.70                | 5899                 | 38.20              | -0.07              |
| G037.84-00.41     | 64.97                                     | 9.05                | 5881                 | 37.91              | -0.34              |
| G037.89-00.41     | 61.15                                     | 9.32                | 5879                 | 37.88              | -0.40              |
| G037.89-00.41     | 61.15                                     | 9.32                | 5882                 | 37.91              | -0.40              |
| G038.04+00.19     | 42.87                                     | 2.80                | 5884                 | 37.97              | 0.00               |
| G038.19-00.16     | 62.85                                     | 4.22                | 5891                 | 38.04              | -0.30              |
| G038.19-00.16     | 62.85                                     | 4.22                | 5897                 | 38.19              | -0.15              |
| G038.19-00.16     | 62.85                                     | 4.22                | 5898                 | 38.20              | -0.16              |
| G038.24-00.16     | 65.40                                     | 8.93                | 5900                 | 38.24              | -0.13              |
| G038.24-00.16     | 65.40                                     | 8.93                | 5905                 | 38.31              | -0.21              |
| G038.24-00.16     | 65.40                                     | 8.93                | 5906                 | 38.33              | -0.22              |
| G038.24-00.16     | 65.40                                     | 8.93                | 5913                 | 38.41              | -0.16              |
| G038.24-00.16     | 65.40                                     | 8.93                | 5917                 | 38.48              | -0.24              |
| G038.49+00.14     | 17.36                                     | 1.27                | 5912                 | 38.40              | 0.14               |
| G038.49+00.14     | 17.36                                     | 1.27                | 5918                 | 38.52              | 0.18               |
| G038.49+00.14     | 17.36                                     | 1.27                | 5919                 | 38.55              | 0.16               |
| G038.49+00.14     | 17.36                                     | 1.27                | 5930                 | 38.68              | 0.19               |
| G038.49+00.14     | 17.36                                     | 1.27                | 5937                 | 38.76              | 0.15               |
| G038.49+00.14     | 17.36                                     | 1.27                | 5939                 | 38.78              | 0.10               |
| G038.49+00.14     | 17.36                                     | 1.27                | 5940                 | 38.81              | 0.10               |
| G038.49+00.14     | 17.36                                     | 1.27                | 5942                 | 38.86              | 0.06               |
| G038.54-00.06     | 16.94                                     | 1.25                | 5901                 | 38.26              | -0.08              |
| G038.54-00.06     | 16.94                                     | 1.25                | 5907                 | 38.35              | -0.03              |
| G038.54-00.06     | 16.94                                     | 1.25                | 5909                 | 38.36              | -0.04              |
| G038.54-00.06     | 16.94                                     | 1.25                | 5911                 | 38.38              | -0.02              |

**Table 1** – continued

| GRS Cloud<br>Name | GRS<br>$V_{LSR}$<br>(km s <sup>-1</sup> ) | GRS<br>$D$<br>(kpc) | BGPS<br>Source<br>ID | BGPS<br>$l$<br>(°) | BGPS<br>$b$<br>(°) |
|-------------------|-------------------------------------------|---------------------|----------------------|--------------------|--------------------|
| G038.54-00.06     | 16.94                                     | 1.25                | 5914                 | 38.42              | -0.17              |
| G038.54-00.06     | 16.94                                     | 1.25                | 5915                 | 38.45              | -0.20              |
| G038.54-00.06     | 16.94                                     | 1.25                | 5920                 | 38.57              | -0.04              |
| G038.59-00.41     | 19.06                                     | 1.35                | 5921                 | 38.58              | -0.25              |
| G038.59-00.41     | 19.06                                     | 1.35                | 5924                 | 38.62              | -0.21              |
| G038.59-00.41     | 19.06                                     | 1.35                | 5945                 | 38.87              | -0.13              |
| G038.69-00.06     | 36.07                                     | 2.38                | 5933                 | 38.73              | -0.13              |
| G038.69-00.06     | 36.07                                     | 2.38                | 5948                 | 38.87              | 0.06               |
| G038.74-00.46     | 50.52                                     | 9.93                | 5902                 | 38.28              | -0.23              |
| G038.74-00.46     | 50.52                                     | 9.93                | 5903                 | 38.29              | -0.20              |
| G038.74-00.46     | 50.52                                     | 9.93                | 5904                 | 38.30              | -0.21              |
| G038.74-00.46     | 50.52                                     | 9.93                | 5931                 | 38.69              | -0.45              |
| G038.74-00.46     | 50.52                                     | 9.93                | 5974                 | 39.27              | -0.39              |
| G038.79-00.51     | 66.25                                     | 8.70                | 5922                 | 38.60              | -0.21              |
| G038.79-00.51     | 66.25                                     | 8.70                | 5923                 | 38.61              | -0.18              |
| G038.79-00.51     | 66.25                                     | 8.70                | 5925                 | 38.65              | -0.23              |
| G038.79-00.51     | 66.25                                     | 8.70                | 5932                 | 38.72              | -0.13              |
| G038.79-00.51     | 66.25                                     | 8.70                | 5934                 | 38.73              | -0.51              |
| G038.79-00.51     | 66.25                                     | 8.70                | 5936                 | 38.76              | -0.53              |
| G038.79-00.51     | 66.25                                     | 8.70                | 5949                 | 38.87              | -0.18              |
| G038.89-00.26     | 44.14                                     | 2.90                | 5928                 | 38.67              | -0.22              |
| G038.89-00.26     | 44.14                                     | 2.90                | 5929                 | 38.68              | -0.23              |
| G038.89-00.26     | 44.14                                     | 2.90                | 5962                 | 38.98              | -0.27              |
| G038.94-00.46     | 41.59                                     | 10.50               | 5938                 | 38.77              | -0.37              |
| G038.94-00.46     | 41.59                                     | 10.50               | 5941                 | 38.85              | -0.43              |
| G038.94-00.46     | 41.59                                     | 10.50               | 5943                 | 38.86              | -0.53              |
| G038.94-00.46     | 41.59                                     | 10.50               | 5944                 | 38.87              | -0.49              |
| G038.94-00.46     | 41.59                                     | 10.50               | 5946                 | 38.87              | -0.38              |
| G038.94-00.46     | 41.59                                     | 10.50               | 5947                 | 38.87              | -0.48              |
| G038.94-00.46     | 41.59                                     | 10.50               | 5951                 | 38.88              | -0.39              |
| G038.94-00.46     | 41.59                                     | 10.50               | 5953                 | 38.90              | -0.46              |
| G038.94-00.46     | 41.59                                     | 10.50               | 5954                 | 38.91              | -0.46              |
| G038.94-00.46     | 41.59                                     | 10.50               | 5956                 | 38.92              | -0.35              |
| G038.94-00.46     | 41.59                                     | 10.50               | 5957                 | 38.92              | -0.42              |
| G038.94-00.46     | 41.59                                     | 10.50               | 5958                 | 38.94              | -0.46              |
| G038.94-00.46     | 41.59                                     | 10.50               | 5960                 | 38.96              | -0.47              |
| G038.94-00.46     | 41.59                                     | 10.50               | 5961                 | 38.97              | -0.54              |
| G038.94-00.46     | 41.59                                     | 10.50               | 5964                 | 39.00              | -0.50              |
| G038.99-00.41     | 60.72                                     | 9.12                | 5952                 | 38.88              | -0.16              |
| G038.99-00.41     | 60.72                                     | 9.12                | 5965                 | 39.01              | -0.42              |
| G038.99-00.41     | 60.72                                     | 9.12                | 5971                 | 39.23              | -0.46              |
| G039.09+00.49     | 22.89                                     | 11.60               | 5959                 | 38.95              | 0.47               |

**Table 1** – continued

| GRS Cloud<br>Name | GRS<br>$V_{LSR}$<br>(km s <sup>-1</sup> ) | GRS<br>$D$<br>(kpc) | BGPS<br>Source<br>ID | BGPS<br>$l$<br>(°) | BGPS<br>$b$<br>(°) |
|-------------------|-------------------------------------------|---------------------|----------------------|--------------------|--------------------|
| G039.09+00.49     | 22.89                                     | 11.60               | 5967                 | 39.10              | 0.49               |
| G039.24-00.61     | 16.50                                     | —                   | 5983                 | 39.48              | -0.42              |
| G039.24-00.61     | 16.50                                     | —                   | 5985                 | 39.49              | -0.42              |
| G039.24-00.61     | 16.50                                     | —                   | 5987                 | 39.53              | -0.46              |
| G039.24-00.06     | 22.46                                     | 11.60               | 5972                 | 39.26              | -0.06              |
| G039.24-00.06     | 22.46                                     | 11.60               | 5977                 | 39.31              | -0.06              |
| G039.29-00.61     | 64.55                                     | 4.43                | 5973                 | 39.27              | -0.59              |
| G039.29-00.61     | 64.55                                     | 4.43                | 5989                 | 39.54              | -0.37              |
| G039.34-00.26     | 69.65                                     | 4.93                | 5968                 | 39.16              | -0.17              |
| G039.34-00.26     | 69.65                                     | 4.93                | 5976                 | 39.29              | -0.20              |
| G039.34-00.26     | 69.65                                     | 4.93                | 5980                 | 39.39              | -0.14              |
| G039.34-00.26     | 69.65                                     | 4.93                | 5982                 | 39.48              | -0.29              |
| G039.34-00.31     | 65.82                                     | 4.55                | 5978                 | 39.33              | -0.32              |
| G039.34-00.31     | 65.82                                     | 4.55                | 5981                 | 39.44              | -0.19              |
| G039.34-00.31     | 65.82                                     | 4.55                | 5993                 | 39.59              | -0.21              |
| G039.49-00.21     | 17.40                                     | —                   | 5979                 | 39.37              | -0.18              |
| G039.49-00.21     | 17.40                                     | —                   | 5984                 | 39.49              | -0.18              |
| G039.49-00.21     | 17.40                                     | —                   | 5986                 | 39.50              | -0.20              |
| G039.49-00.21     | 17.40                                     | —                   | 5997                 | 39.67              | -0.16              |
| G039.59-00.01     | 43.29                                     | 2.85                | 5990                 | 39.56              | -0.03              |
| G039.59-00.01     | 43.29                                     | 2.85                | 5991                 | 39.57              | -0.04              |
| G039.59-00.01     | 43.29                                     | 2.85                | 5992                 | 39.57              | 0.01               |
| G039.69-00.56     | 83.25                                     | 6.55                | 5998                 | 39.68              | -0.46              |
| G039.69-00.56     | 83.25                                     | 6.55                | 6002                 | 39.73              | -0.40              |
| G039.89-00.21     | 57.80                                     | —                   | 5994                 | 39.64              | -0.24              |
| G039.89-00.21     | 57.80                                     | —                   | 5995                 | 39.64              | -0.26              |
| G039.89-00.21     | 57.80                                     | —                   | 5996                 | 39.65              | -0.25              |
| G039.89-00.21     | 57.80                                     | —                   | 5999                 | 39.68              | -0.18              |
| G039.89-00.21     | 57.80                                     | —                   | 6001                 | 39.69              | -0.22              |
| G039.89-00.21     | 57.80                                     | —                   | 6003                 | 39.85              | -0.39              |
| G039.89-00.21     | 57.80                                     | —                   | 6004                 | 39.86              | -0.21              |
| G039.89-00.21     | 57.80                                     | —                   | 6005                 | 39.88              | -0.17              |
| G039.89-00.21     | 57.80                                     | —                   | 6006                 | 39.88              | -0.35              |
| G039.89-00.21     | 57.80                                     | —                   | 6008                 | 39.91              | -0.28              |
| G039.89-00.21     | 57.80                                     | —                   | 6009                 | 39.92              | -0.29              |
| G039.89-00.21     | 57.80                                     | —                   | 6011                 | 39.93              | -0.16              |
| G039.89-00.21     | 57.80                                     | —                   | 6012                 | 39.95              | -0.29              |
| G039.89-00.21     | 57.80                                     | —                   | 6014                 | 40.07              | 0.19               |
| G040.09-00.51     | 57.75                                     | 9.10                | 6016                 | 40.11              | -0.52              |
| G040.09-00.51     | 57.75                                     | 9.10                | 6018                 | 40.17              | -0.45              |
| G040.09-00.51     | 57.75                                     | 9.10                | 6019                 | 40.18              | -0.47              |
| G040.09-00.51     | 57.75                                     | 9.10                | 6021                 | 40.23              | -0.40              |

**Table 1** – continued

| GRS Cloud<br>Name | GRS<br>$V_{LSR}$<br>(km s <sup>-1</sup> ) | GRS<br>$D$<br>(kpc) | BGPS<br>Source<br>ID | BGPS<br>$l$<br>(°) | BGPS<br>$b$<br>(°) |
|-------------------|-------------------------------------------|---------------------|----------------------|--------------------|--------------------|
| G40.29+00.19      | 82.82                                     | 6.47                | 6017                 | 40.16              | 0.17               |
| G040.34-00.26     | 72.20                                     | 5.43                | 6022                 | 40.27              | -0.47              |
| G040.34-00.26     | 72.20                                     | 5.43                | 6023                 | 40.28              | -0.27              |
| G040.34-00.26     | 72.20                                     | 5.43                | 6024                 | 40.28              | -0.22              |
| G040.34-00.26     | 72.20                                     | 5.43                | 6025                 | 40.28              | -0.25              |
| G040.34-00.26     | 72.20                                     | 5.43                | 6026                 | 40.36              | -0.06              |
| G040.84-00.16     | 23.74                                     | 1.65                | 6030                 | 40.70              | -0.13              |
| G040.84-00.16     | 23.74                                     | 1.65                | 6032                 | 40.80              | -0.22              |
| G040.84-00.16     | 23.74                                     | 1.65                | 6034                 | 40.88              | -0.23              |
| G040.84-00.16     | 23.74                                     | 1.65                | 6035                 | 40.88              | -0.23              |
| G040.84-00.16     | 23.74                                     | 1.65                | 6036                 | 40.91              | -0.25              |
| G040.89-00.21     | 26.70                                     | —                   | 6029                 | 40.62              | -0.14              |
| G041.04-00.26     | 39.04                                     | 10.23               | 6044                 | 41.12              | -0.11              |
| G041.04-00.26     | 39.04                                     | 10.23               | 6053                 | 41.19              | 0.12               |
| G041.04-00.26     | 39.04                                     | 10.23               | 6054                 | 41.21              | 0.12               |
| G041.04-00.26     | 39.04                                     | 10.23               | 6057                 | 41.22              | 0.17               |
| G041.04-00.26     | 39.04                                     | 10.23               | 6059                 | 41.24              | 0.17               |
| G041.04-00.26     | 39.04                                     | 10.23               | 6061                 | 41.26              | 0.21               |
| G041.04-00.26     | 65.82                                     | 4.72                | 6037                 | 41.02              | -0.27              |
| G041.04-00.26     | 65.82                                     | 4.72                | 6039                 | 41.06              | -0.10              |
| G041.04-00.26     | 65.82                                     | 4.72                | 6040                 | 41.08              | -0.12              |
| G041.04-00.26     | 65.82                                     | 4.72                | 6049                 | 41.16              | -0.14              |
| G041.19-00.21     | 59.87                                     | 8.65                | 6038                 | 41.05              | -0.25              |
| G041.19-00.21     | 59.87                                     | 8.65                | 6041                 | 41.08              | -0.25              |
| G041.19-00.21     | 59.87                                     | 8.65                | 6042                 | 41.10              | -0.24              |
| G041.19-00.21     | 59.87                                     | 8.65                | 6045                 | 41.12              | -0.22              |
| G041.19-00.21     | 59.87                                     | 8.65                | 6046                 | 41.13              | -0.24              |
| G041.19-00.21     | 59.87                                     | 8.65                | 6047                 | 41.14              | -0.19              |
| G041.19-00.21     | 59.87                                     | 8.65                | 6050                 | 41.16              | -0.18              |
| G041.19-00.21     | 59.87                                     | 8.65                | 6051                 | 41.17              | -0.49              |
| G041.19-00.21     | 59.87                                     | 8.65                | 6055                 | 41.22              | -0.16              |
| G041.19-00.21     | 59.87                                     | 8.65                | 6058                 | 41.23              | -0.20              |
| G041.19-00.21     | 59.87                                     | 8.65                | 6060                 | 41.24              | -0.23              |
| G041.19-00.21     | 59.87                                     | 8.65                | 6064                 | 41.31              | -0.17              |
| G041.19-00.21     | 59.87                                     | 8.65                | 6065                 | 41.33              | -0.19              |
| G041.19-00.21     | 59.87                                     | 8.65                | 6066                 | 41.34              | -0.21              |
| G041.24+00.39     | 71.35                                     | 5.53                | 6056                 | 41.22              | 0.36               |
| G041.29+00.34     | 14.81                                     | 11.65               | 6062                 | 41.27              | 0.37               |
| G041.29+00.34     | 14.81                                     | 11.65               | 6068                 | 41.35              | 0.41               |
| G041.34-00.16     | 13.54                                     | 11.70               | 6043                 | 41.11              | -0.12              |
| G041.34-00.16     | 13.54                                     | 11.70               | 6067                 | 41.35              | -0.14              |
| G041.34-00.16     | 13.54                                     | 11.70               | 6073                 | 41.53              | 0.03               |

**Table 1** – continued

| GRS Cloud<br>Name | GRS<br>$V_{LSR}$<br>(km s <sup>-1</sup> ) | GRS<br>$D$<br>(kpc) | BGPS<br>Source<br>ID | BGPS<br>$l$<br>(°) | BGPS<br>$b$<br>(°) |
|-------------------|-------------------------------------------|---------------------|----------------------|--------------------|--------------------|
| G041.34-00.16     | 13.54                                     | 11.70               | 6074                 | 41.53              | 0.03               |
| G041.34+00.09     | 60.30                                     | 8.55                | 6052                 | 41.18              | 0.05               |
| G041.34+00.09     | 60.30                                     | 8.55                | 6063                 | 41.31              | -0.11              |
| G041.34+00.09     | 60.30                                     | 8.55                | 6069                 | 41.38              | 0.04               |
| G041.34+00.09     | 60.30                                     | 8.55                | 6070                 | 41.49              | 0.03               |
| G041.34+00.09     | 60.30                                     | 8.55                | 6072                 | 41.52              | -0.14              |
| G041.34+00.09     | 60.30                                     | 8.55                | 6075                 | 41.54              | 0.03               |
| G041.74+00.04     | 17.79                                     | 11.38               | 6076                 | 41.60              | 0.16               |
| G041.74+00.04     | 17.79                                     | 11.38               | 6077                 | 41.71              | 0.04               |
| G041.74+00.04     | 17.79                                     | 11.38               | 6078                 | 41.72              | 0.04               |
| G041.74+00.04     | 17.79                                     | 11.38               | 6079                 | 41.72              | 0.00               |
| G042.04-00.01     | 57.75                                     | 8.60                | 6084                 | 41.85              | -0.24              |
| G042.04-00.01     | 57.75                                     | 8.60                | 6089                 | 41.94              | -0.21              |
| G042.04-00.01     | 57.75                                     | 8.60                | 6091                 | 41.99              | -0.03              |
| G042.04-00.01     | 57.75                                     | 8.60                | 6093                 | 42.04              | -0.12              |
| G042.04-00.01     | 57.75                                     | 8.60                | 6095                 | 42.05              | -0.12              |
| G042.04-00.01     | 57.75                                     | 8.60                | 6097                 | 42.11              | -0.45              |
| G042.04-00.01     | 57.75                                     | 8.60                | 6104                 | 42.34              | -0.22              |
| G042.04-00.01     | 57.75                                     | 8.60                | 6106                 | 42.45              | -0.46              |
| G042.09-00.11     | 16.51                                     | 1.23                | 6085                 | 41.88              | -0.12              |
| G042.09-00.11     | 16.51                                     | 1.23                | 6099                 | 42.16              | -0.23              |
| G042.09-00.11     | 16.51                                     | 1.23                | 6100                 | 42.17              | -0.08              |
| G042.14-00.61     | 67.52                                     | 5.12                | 6088                 | 41.94              | -0.25              |
| G042.14+00.09     | 15.66                                     | 1.17                | 6094                 | 42.05              | 0.21               |
| G042.19-00.61     | 34.79                                     | 2.33                | 6082                 | 41.74              | 0.10               |
| G042.29-00.51     | 75.60                                     | 6.28                | 6103                 | 42.32              | -0.51              |
| G042.34-00.31     | 27.60                                     | —                   | 6090                 | 41.98              | -0.31              |
| G042.34-00.31     | 27.60                                     | —                   | 6102                 | 42.31              | -0.30              |
| G042.44-00.26     | 65.40                                     | 4.90                | 6098                 | 42.15              | -0.24              |
| G042.44-00.26     | 65.40                                     | 4.90                | 6105                 | 42.44              | -0.26              |
